# Supplementary material for: The NF1 Gene Contains Hotspots for L1 Endonuclease-Dependent De Novo Insertion
Source: PubMed Central journal article supplement (PMC3219598; doi:10.1371/journal.pgen.1002371), 2011-11-17
Supplement: pgen.1002371.s007.pdf [file pgen.1002371.s007.pdf]

Table S1 A. List of primers for amplification of *NF1* exons, *ALU* - and L1 sequences

| Exon                                                    | Name     | Sequence 5'-3'                  | Orientation               | Size              | PCR        | Enzyme     | Buffer   |
|---------------------------------------------------------|----------|---------------------------------|---------------------------|-------------------|------------|------------|----------|
| 6 (4c)                                                  | 6cf      | GCAAAAGTAATACGTAAATGGAAAG       | fwd                       | 904/>1170         | 1          | Invitrogen |          |
|                                                         | 6cr      | TGATGTACCCAAGCAACAAAGAC         | rev                       |                   |            |            |          |
| 6 (4c)                                                  | 6cf      | GCAAAAGTAATACGTAAATGGAAAG       | fwd                       | 403/- *           | 2          | Invitrogen |          |
|                                                         | 6c_sr    | CTACCCAGTTCCAAAATGCC            | rev                       |                   |            |            |          |
| 11 (9)                                                  | 11f      | CTTTCTATTTGCTGTTCTTTTTGG        | fwd                       | 264/ <sup>§</sup> | 6          | Roche      | 1,2&3    |
|                                                         | 11f_new  | TATTTCTCACTATTATGTATTGATGTTCTGT | fwd                       | 330/>550          |            |            |          |
|                                                         | 11r      | CCTTTTTGAAAACCAAGAGTGCAAT       | rev                       |                   |            |            |          |
| 12 (10a)                                                | 12af     | ACGTAATTTTGTACTTTTTCTTCC        | fwd                       | 222/>500          | 3          | Platinum   |          |
|                                                         | 12ar     | CAATAGAAAAGGAGGTGAGATTC         | rev                       |                   |            |            |          |
| 15(11)                                                  | 15f      | CTCCAGTGTATGTTTACCAAAAA         | fwd                       | 263/>600          | 4          | Takara     |          |
|                                                         | 15r      | CTTTGGAAAGTGAAGTTTTACAATGT      | rev                       |                   |            |            |          |
| 21 (16)                                                 | 21f      | GGAAGAAATGTTGGATAAAGCA          | fwd                       | 610/>1000         | 4          | Takara     |          |
|                                                         | 21r      | TAAATAATCTGAAAAGAAAAAGGCTTA     | rev                       |                   |            |            |          |
| 22 (17)                                                 | 22f      | CTCTGTGTGTTTAGATCAGTCA          | fwd                       | 319/>700          | 4          | Platinum   |          |
|                                                         | 22r      | TTTATCAATTACTACCAAGTATCAG       | rev                       |                   |            |            |          |
| 23 (18)                                                 | 23f      | AGAAGTTGTGTACGTTCTTTTCT         | fwd                       | 367/>2000         | 6          | Roche      | 3        |
|                                                         | 23r      | CTCCTTTCTACCAATAACCGC           | rev                       |                   |            |            |          |
| 25 (19b)                                                | 25f      | ATTACCTTCTCCCAATTTGA            | fwd                       | 372/~500          | 4          | Takara     |          |
|                                                         | 25r      | GGCTTTATTTGCTTTTTGC             | rev                       |                   |            |            |          |
| 33 (25)                                                 | 33f      | CATTTTATTATAGCAGATGTC           | fwd                       | 533/>900          | 5          | Takara     |          |
|                                                         | 33r      | ACTTACACAGGAACCTTCAT            | rev                       |                   |            |            |          |
| 39 (30)                                                 | 39f      | TTGGAACATAAGGAAAAATACGTTT       | fwd                       | 321/>6000?        | 6          |            |          |
|                                                         | 39r      | AGGGTTTTCTTTGAATCTCTTAGA        | rev                       |                   |            |            |          |
| 47 (38)                                                 | 47f      | ATAGACCTCATCTCACATTCAGC         | fwd                       | 816/>1080         | 2          | Invitrogen |          |
|                                                         | 47r      | CATAGTTCTTTATGAGCTGGTAAGG       | rev                       |                   |            |            |          |
| 49 (40)                                                 | 49f      | CCTTTCTTGCAGAGTTGTTA            | fwd                       | 371/>700          | 4          | Takara     |          |
|                                                         | 49r      | CACCACTAAAAGGACTAGACTGT         | rev                       |                   |            |            |          |
| <b><i>Alu</i> - and <i>LINE</i> specific PCR primer</b> |          |                                 |                           |                   |            |            |          |
| 6 (4c)                                                  | Alu_6cf  | AGTTATAAATAGCCTGGAGGCC          | fwd                       | ~ 1200            | 7          | Invitrogen |          |
|                                                         | 6cr      | TGATGTACCCAAGCAACAAAGAC         | rev                       |                   |            |            |          |
| 9 (7)                                                   | 9f       | GCTGACAGAAAGTGCTGCAA            | fwd                       | ~1300bp           | 6          | Roche      | 1,2&3    |
|                                                         | Line9_r  | CTTTTGGCTTAGGATTGACTTGG         | rev                       |                   |            |            |          |
|                                                         | Line10_f | CCAAGTCAATCCTAAGCCAAAAG         | fwd                       | 934               | 4          | Platinum   |          |
| 10r                                                     | 10r      | CAAGGCAGTCAATCATTAGATCC         | rev                       |                   |            |            |          |
|                                                         | 39 (30)  | 39f                             | GTAACAGAATCACAATTGTATGTTA | fwd               | 355        | 8          | Platinum |
| 47 (38)                                                 | L1-5_39r | CTTCCCAGGTGAGGCAATG             | rev                       |                   |            |            |          |
|                                                         | Alu_47f  | GCAGGTACCGCACTTCTTTT            | fwd                       | ~ 600             | 7          | Invitrogen |          |
| 47r                                                     | 47r      | CATAGTTCTTTATGAGCTGGTAAGG       | rev                       |                   |            |            |          |
|                                                         | 47f      | ATAGACCTCATCTCACATTCAGC         | fwd                       | ~ 950             | 7          |            |          |
| Alu_47r                                                 | Alu_47r  | CAAGAAGTGCGGTACCTCAC            | rev                       |                   |            |            |          |
|                                                         | Line_Fam | L1_Fam                          | GAACAATGAGATCACATGGACAC   | fwd               | Sequencing |            |          |
| L1 (~6kb)                                               | Line_2f  | AAGCAGGGCGAGGCATTG              | fwd                       | Sequencing        |            |            |          |
|                                                         | Line_3f  | CAGACTGCCTCCTCAAGTG             | fwd                       | Sequencing        |            |            |          |
|                                                         | Line_4f  | CAAGAAGTGCGGTACCTCAC            | fwd                       | Sequencing        |            |            |          |
|                                                         | Line_5f  | GAAACCTTACAAGCCAGAAG            | fwd                       | Sequencing        |            |            |          |
|                                                         | Line_6f  | AGACACAGACTGGCAAGTTG            | fwd                       | Sequencing        |            |            |          |
|                                                         | Line_7f  | GCACCAAGCAGACCTAATAGAC          | fwd                       | Sequencing        |            |            |          |
|                                                         | Line_8f  | TGCCTACAAGAGAAAGCAGG            | fwd                       | Sequencing        |            |            |          |
|                                                         | Line_2r  | GCTGCACCCACTAATGTGTC            | rev                       | Sequencing        |            |            |          |
|                                                         | Line_3r  | GCCATTCTAACTGGTGTGAG            | rev                       | Sequencing        |            |            |          |
|                                                         | Line_4r  | GCTTTCTACATATGGCTAGCC           | rev                       | Sequencing        |            |            |          |
|                                                         | Line_5r  | AGTTCTCCTTGAAGAGGTCC            | rev                       | Sequencing        |            |            |          |
|                                                         | Line_6r  | GAGGGTTTGTATAGATAGCTC           | rev                       | Sequencing        |            |            |          |

wt = wild type allele, mut = mutant allele, program = PCR program, fwd = forward primer, rev = reverse primer, \* mutant allele does not amplify under these conditions; § does not amplify the mutant allele since the primer is within the deleted sequence associated with the *Alu* insertion; primer 11f\_new was used to amplify the mutant allele

Table S1 B. List of PCR programs

| Prog. nr. | Denat. | Cycle 1                                        | Cycle 2                                           | Final elong. | Store |
|-----------|--------|------------------------------------------------|---------------------------------------------------|--------------|-------|
| 1         | 95° 3' | (94° 30'' - 59° 30'' - 72° 4') x 40            | -                                                 | 72° 7'       | 4°    |
| 2         | 95° 3' | (94° 20'' - 59.5° 25'' - 72° 45'') x 40        | -                                                 | 72° 7'       | 4°    |
| 3         | 94° 3' | (94° 20'' - 61° 15''(-1°/cycle) - 72° 1') x 11 | (94° 40'' - 52° 40'' - 72° 30'') x 24             | 72° 10'      | 15°   |
| 4         | 92° 4' | (92° 30'' - 58° 30'' - 72° 3') x 19            | (92° 30'' - 58° 30'' - 72° 3' (+10''/cycle)) x 25 | 72° 10'      | 15°   |
| 5         | 95° 5' | (95° 30'' - 58° 20'' - 72° 1'30'') x 35        | -                                                 | 72° 10'      | 15°   |
| 6         | 94° 2' | (94° 10'' - 58° 30'' - 68° 10') x 10           | (94° 15'' - 58° 30'' - 68° 10'(+20''/cycle)) x 25 | 68° 7'       | 15°   |
| 7         | 95° 3' | (94° 20'' - 62° 20'' - 72° 1') x 10            | (94° 40'' - 52° 40'' - 72° 1') x 30               | 72° 10'      | 4°    |
| 8         | 95° 3' | (95° 20'' - 65° 15''(-1°/cycle) - 72° 30'')x8  | (95° 30'' - 58° 30'' - 72° 30'') x 25             | 72° 10'      | 15°   |
